# Supplementary material
Source: PubMed Central journal article supplement (PMC5410179)
Supplement: NIHMS840693-supplement-supplement_1.pdf [file NIHMS840693-supplement-supplement_1.pdf]

Supplementary Table 1: Potential Predictors of Intercept, and Piecewise 1 and Piecewise 2 Linear and Quadratic Components for Morning Energy

| Potential Predictors                                         | Intercept | Piecewise 1<br>Linear<br>Component | Piecewise 1<br>Quadratic<br>Component | Piecewise 2<br>Linear<br>Component | Piecewise 2<br>Quadratic<br>Component |
|--------------------------------------------------------------|-----------|------------------------------------|---------------------------------------|------------------------------------|---------------------------------------|
| <b>Demographic Characteristics</b>                           |           |                                    |                                       |                                    |                                       |
| Age                                                          |           |                                    |                                       |                                    |                                       |
| Sex                                                          |           |                                    |                                       | ◆                                  | ◆                                     |
| Ethnicity (White versus Non-White)                           |           |                                    |                                       |                                    |                                       |
| Education                                                    | ◆         |                                    |                                       |                                    |                                       |
| Marital status                                               | ◆         |                                    |                                       |                                    |                                       |
| Live alones                                                  | ◆         |                                    |                                       |                                    |                                       |
| Employment status                                            | ◆         |                                    |                                       | ◆                                  | ◆                                     |
| Child care responsibilities                                  | ◆         |                                    |                                       |                                    |                                       |
| <b>Clinical Characteristics</b>                              |           |                                    |                                       |                                    |                                       |
| Body mass index (kg/m <sup>2</sup> )                         | ◆         |                                    |                                       | ◆                                  | ◆                                     |
| Past or current history of smoking                           |           |                                    |                                       |                                    |                                       |
| Hemoglobin (gm/dL)                                           | ◆         |                                    |                                       |                                    |                                       |
| Karnofsky Performance Status Scale score                     | ◆         |                                    |                                       | ◆                                  | ◆                                     |
| Self-administered Comorbidity Questionnaire score            | ◆         |                                    |                                       | ◆                                  |                                       |
| Exercise on a regular basis                                  | ◆         |                                    |                                       |                                    |                                       |
| Time since cancer diagnosis                                  |           |                                    |                                       |                                    |                                       |
| Any prior cancer treatments                                  |           |                                    |                                       |                                    |                                       |
| Number prior cancer treatments                               |           |                                    |                                       |                                    |                                       |
| Presence of metastatic disease                               |           |                                    |                                       |                                    |                                       |
| Number of metastatic sites including lymph node involvement  |           |                                    |                                       |                                    |                                       |
| Number of metastatic sites excluding lymph node involvement  |           |                                    |                                       |                                    |                                       |
| <b>Symptom Characteristics</b>                               |           |                                    |                                       |                                    |                                       |
| Lee Fatigue Scale: Evening fatigue score at enrollment       | ◆         | ◆                                  |                                       | ◆                                  | ◆                                     |
| Lee Fatigue Scale: Morning fatigue score at enrollment       | ◆         |                                    |                                       | ◆                                  | ◆                                     |
| Lee Fatigue Scale: Evening energy score at enrollment        | ◆         |                                    |                                       |                                    |                                       |
| Lee Fatigue Scale: Morning energy score at enrollment        |           | ◆                                  | ◆                                     | ◆                                  | ◆                                     |
| Center for Epidemiological Studies-Depression Scale score at | ◆         |                                    |                                       | ◆                                  | ◆                                     |

enrollment

General Sleep Disturbance Scale score at enrollment

◆

◆

◆

Trait Anxiety score at enrollment

◆

◆

◆

State Anxiety score at enrollment

◆

◆

◆

Attentional Function Index score at enrollment

◆

◆

◆

Pain present at enrollment

◆

◆ = From exploratory analysis had a *t*-value of  $\geq 2.0$ .

Abbreviations: gm/dL = grams per deciliter; kg/m<sup>2</sup> = kilogram per meters squared.

Supplementary Table 2: Potential Predictors of Intercept, and Piecewise 1 and Piecewise 2 Linear and Quadratic Components for Evening Energy

| Potential Predictors                                         | Intercept | Piecewise 1<br>Linear<br>Component | Piecewise 1<br>Quadratic<br>Component | Piecewise 2<br>Linear<br>Component | Piecewise 2<br>Quadratic<br>Component |
|--------------------------------------------------------------|-----------|------------------------------------|---------------------------------------|------------------------------------|---------------------------------------|
| <b>Demographic Characteristics</b>                           |           |                                    |                                       |                                    |                                       |
| Age                                                          | ◆         |                                    |                                       |                                    |                                       |
| Sex                                                          | ◆         |                                    |                                       |                                    | ◆                                     |
| Ethnicity (White versus Non-White)                           | ◆         |                                    |                                       |                                    |                                       |
| Education                                                    |           |                                    |                                       |                                    | ◆                                     |
| Marital status                                               |           |                                    |                                       |                                    |                                       |
| Live alones                                                  |           |                                    |                                       |                                    |                                       |
| Employment status                                            |           |                                    |                                       |                                    |                                       |
| Child care responsibilities                                  | ◆         |                                    |                                       |                                    |                                       |
| <b>Clinical Characteristics</b>                              |           |                                    |                                       |                                    |                                       |
| Body mass index (kg/m <sup>2</sup> )                         |           |                                    |                                       |                                    |                                       |
| Past or current history of smoking                           |           |                                    |                                       |                                    |                                       |
| Hemoglobin (gm/dL)                                           | ◆         | ◆                                  |                                       |                                    | ◆                                     |
| Karnofsky Performance Status Scale score                     | ◆         |                                    |                                       |                                    | ◆                                     |
| Self-administered Comorbidity Questionnaire score            | ◆         |                                    |                                       |                                    |                                       |
| Exercise on a regular basis                                  | ◆         |                                    |                                       |                                    | ◆                                     |
| Time since cancer diagnosis                                  |           |                                    |                                       |                                    |                                       |
| Any prior cancer treatments                                  |           |                                    |                                       |                                    |                                       |
| Number prior cancer treatments                               |           |                                    |                                       |                                    |                                       |
| Presence of metastatic disease                               |           |                                    |                                       |                                    |                                       |
| Number of metastatic sites including lymph node involvement  |           |                                    |                                       |                                    |                                       |
| Number of metastatic sites excluding lymph node involvement  |           |                                    |                                       |                                    |                                       |
| <b>Symptom Characteristics</b>                               |           |                                    |                                       |                                    |                                       |
| Lee Fatigue Scale: Evening fatigue score at enrollment       | ◆         |                                    |                                       |                                    | ◆                                     |
| Lee Fatigue Scale: Morning fatigue score at enrollment       | ◆         |                                    |                                       |                                    |                                       |
| Lee Fatigue Scale: Evening energy score at enrollment        |           | ◆                                  | ◆                                     |                                    |                                       |
| Lee Fatigue Scale: Morning energy score at enrollment        | ◆         |                                    |                                       |                                    | ◆                                     |
| Center for Epidemiological Studies-Depression Scale score at | ◆         |                                    |                                       |                                    |                                       |

enrollment

General Sleep Disturbance Scale score at enrollment

◆

◆

Trait Anxiety score at enrollment

◆

State Anxiety score at enrollment

◆

Attentional Function Index score at enrollment

◆

◆

Pain present at enrollment

◆

◆ = From exploratory analysis had a *t*-value of  $\geq 2.0$ .

Abbreviations: gm/dL = grams per deciliter; kg/m<sup>2</sup> = kilogram per meters squared.
